# Supplementary material for: TGF-β2, EGF, and FGF21 Growth Factors Present in Breast Milk Promote Mesenteric Lymph Node Lymphocytes Maturation in Suckling Rats
Source: MDPI journal article supplement (doi:10.3390/nu10091171), 2018-08-27
Supplement: s1 [file s1]

Supplementary Figure S1.

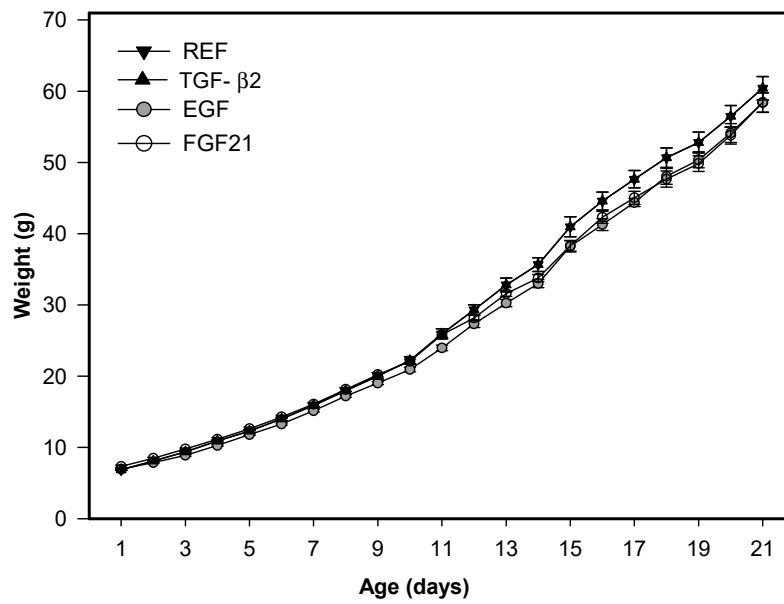

Growth curve of all studied groups during the suckling period (from 1 to 21 days of life). Results are expressed as mean  $\pm$  S.E.M (n=9-27 pups/group).

Supplementary Figure S2.

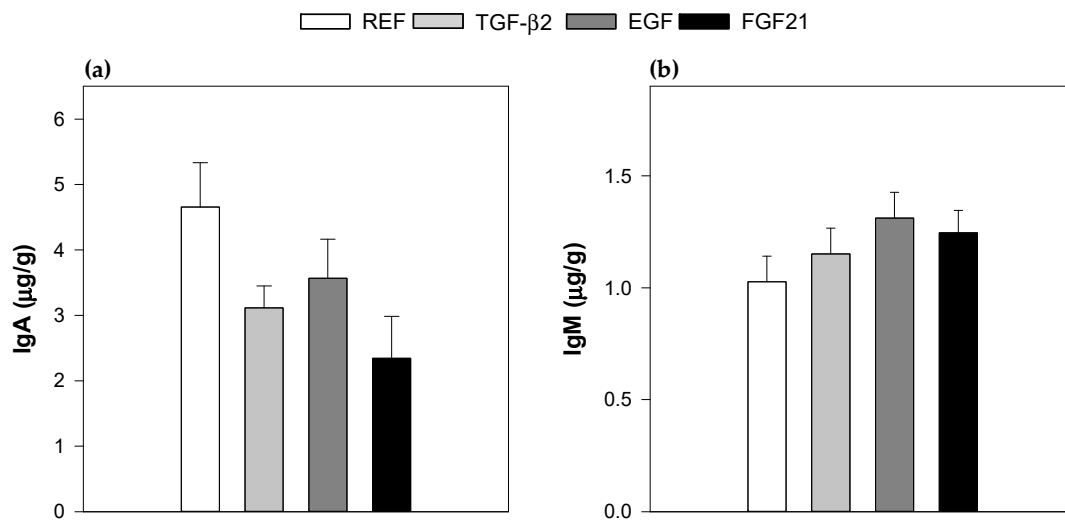

IgA and IgM concentration in gut wash from 21-day-old animals after the different nutritional interventions. (a) IgA; (b) IgM. Results are expressed as concentration of Igs normalized per gram of tissue used for the gut wash ( $\mu\text{g/g}$ ) represented as mean  $\pm$  S.E.M (n=9).

Supplementary Figure S3.

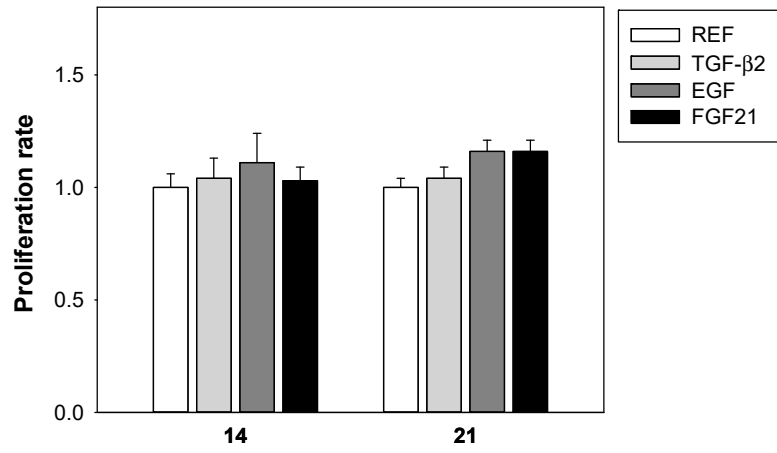

Proliferation of mesenteric lymph nodes lymphocytes at 14 and 21 days of life. Results are expressed as proliferation rate  $\pm$  S.E.M (n=9).

**Supplementary Table S1.****Table S1.** List of mAbs used for immunophenotyping the MLN cells.

| <b>Anti-rat mAbs</b>            | <b>Clone</b> | <b>Fluorochrome<sup>1</sup></b> | <b>Concentration<br/>(<math>\mu\text{g}/\text{mL}</math>)</b> | <b>Supplier</b>   |
|---------------------------------|--------------|---------------------------------|---------------------------------------------------------------|-------------------|
| Anti-CD4                        | OX-35        | APC/PE                          | 7/5                                                           | BD Biosciences    |
| Anti-CD8 $\alpha$               | OX-8         | PerCP                           | 10                                                            | BD Biosciences    |
| Anti-CD8 $\beta$                | 3.41         | FITC                            | 17                                                            | BD Biosciences    |
| Anti-TCR $\alpha\beta$          | R73          | FITC                            | 17                                                            | BD Biosciences    |
| Anti-TCR $\gamma\delta$         | V65          | PE                              | 10                                                            | BD Biosciences    |
| Anti-NKR-P1A                    | 10/78        | PE                              | 12                                                            | BD Biosciences    |
| Anti-CD45RA                     | OX-33        | APC-Cy7                         | 20                                                            | BD Biosciences    |
| Anti-CD25                       | OX-39        | FITC                            | 25                                                            | BD Biosciences    |
| Anti-CD103 ( $\alpha\text{E}$ ) | OX-62        | FITC                            | 50                                                            | Biolegend         |
| Anti-CD62L                      | OX-85        | PE                              | 13                                                            | Biolegend         |
| Anti-TLR4                       | 76B357.1     | PE                              | 25                                                            | Novus Biologicals |
| Anti-Foxp3                      | FJK-165      | APC                             | 5                                                             | eBioscience       |

<sup>1</sup>Allophycocyanin (APC), phycoerythrin (PE), peridinin-chlorophyll-a protein (PerCP), fluorescein isothiocyanate (FITC), APC-cyanine 7 (APC-Cy7)
